# Supplementary material for: Developing a School-Based Risk and Resilience Network to Implement the Youth Aware of Mental Health (YAM) Program with Texas Adolescents
Source: Research Square preprint supplement (doi:10.21203/rs.3.rs-675974/v1), 2021-07-09
Supplement: Supplementary file 1 [file 944f1c7a723aef42370064b4.docx]

Please let us know your satisfaction level in each of the following:

1. Overall, I think the YAM program was:

1 2 3 4 5

Not Helpful Neutral Helpful

1. I believe the YAM program added to my understanding of mental health

1 2 3 4 5

Strongly Disagree Neutral Strongly Agree

1. It was worth missing regular class time for the YAM program

1 2 3 4 5

Strongly Disagree Neutral Strongly Agree

1. The YAM facilitator was skilled at presenting topics and answer questions

1 2 3 4 5

Strongly Disagree Neutral Strongly Agree

1. The YAM program gave me knowledge and skills I can use.

1 2 3 4 5

Strongly Disagree Neutral Strongly Agree

1. What are 2 things you enjoyed about the YAM Program?

What would you change about the YAM program?
